Development 133, 2087 (2006) doi:10.1242/dev.02414

## Classic cadherins regulate tangential migration of precerebellar neurons in the caudal hindbrain

**Hiroki Taniguchi, Daisuke Kawauchi, Kazuhiko Nishida and Fujio Murakami** *Development* **133**, 1923-1931.

There were a few errors in the first ePress article published on April 12, 2006. The second ePress article published on April 19, 2006, the final online version and the print version are all correct.

In the first ePress article, Fig. 4 was positioned incorrectly so that the left-hand side of the figure is missing. In addition, in the Materials and methods, the two occurrences of 'Ex utero' should have been corrected to 'Exo utero'.

We apologise to the authors and readers for these mistakes.
